# Supplementary material
Source: PubMed Central journal article supplement (PMC5354236)
Supplement: kfly-11-01-1220463-s001.pdf [file kfly-11-01-1220463-s001.pdf]

# Supplemental file: Annotated donor plasmid sequences and primer list

## Supplemental text A: Annotated pGEM-WingGFP-*tan* sequence (7290bp):

Underlined sequences represent primers used for plasmid construction and screening.

Double underlines represent areas where two primers overlap

5' homology arm

5' target PAM

Unique portion of 5' target site for reporter excision (restriction sites: BglII, BsiWI, Acc65I)

Pupal wing enhancer from *D. melanogaster yellow* gene

EGFP with Hsp70 promoter and SV40 polyadenylation signal

Unique portion of 3' target site for reporter excision (restriction sites: NarI, Bsu36I, ClaI)

3' homology arm

3' target PAM

Restriction sites within pGEM backbone for homology arm removal: 5' end – Apal, SphI; 3' end – SbfI, MluI

ATTACGCCAGCTGGCGAAAGGGGGATGTGCTGCAAGGCGATTAAGTTGGGTAACGCCAGGGTTTTCCAGTCACGACGT  
TGAAAACGACGGCCAGTGAATTGTAATACGACTACTATAGGGCGAATTGGGCCGACGTCGCATGCTCCCGGCCGCCA  
TGGCGGCCGCGGAATTCGATCTCTGGATAAGCGTCAGCCTCGCGTTGCGTCGCAGTCGCAGTCGCAGTCGCCTTCGCTG  
CTGGCGTGCAGCGTCGCCATTGCTGTTATTGTTGTTGCTGTGTTTCTATATGCGTTGCTGCTCCGTTATCGCAGCGACG  
TCGTCGTCGTCGTCGTCGTCATCAGCTGTCTCGTGTGTTGTTGTGCTTTTTGCTGAGTGTTGTTGTTGCGCACCTCG  
AATTGCTGCCGCAAACATGTCCAATTCAGTTTGAATTCTGCCTTCAAGCGCTTGAACAATCATATAAAAACCTGGCTT  
GAATTATCTATATAACAATTGTTTACACTGAAATCTCTCTCTCTCGTAACCTTCTCTCGCTCTGTCTGTGTGTGCGTG  
CGTGTGTTGAGTGTTGGTAAAGTTTGTAAATGAAATTATAACTCAGTTGTGTTTTTTTTATTATTATTATTATTCATCT  
TGTAATTTGTTTTGTTTTGTTGCAAATTTGTTGAATCACTTTCCAGCGAGTTTTATTCCACTGAATTATTATATA  
TATTTCTGTGCTTTATTTTTGTTTTGCTCTTTCTATTTACATTTGTGATCGTGGATAAGACGAACCCAAGCAAAAAAAAAA  
AAAGAAAAGAAAAGAATAATTGAGAGCATATTACTGCTCATCCTGCTCGAATTCAGAGCCAATAGCGCGAAGAGC  
GATAAACGGTCCACAGCACATAGACCAAACGAAAGCCAGGAAGCCATGTGCACCTCCCCGGTGGCCACCAAATGTC  
GTCCAGCATGTCTCCGGCAAGATCTCGTACGGTACCATCCATACTCATCAATTATCTTATAGCTTATCGTTACGTGTACGG  
CGCGCAATGGCGAAACTGGAAACACTAACTAGTAAATGCGAAATGTATCATATGGATTTTCATATTTTTTCCACTGCTA  
ATGGAATGTTTGCCTGAAGAGATTGGTCGACTATTAATGATTATCGCCGATTACCACATTGAGTGGTTTAAAATAGC  
CATAAATATGCAACTGACGATGGCTTAAGATAAATACGTCGCAGAGTCACTCATAAATTCGAACGCAGCCCCTGATTT  
ACCTACCCCTCTAAACGATTCATAGTATATGTACGAGTATATCCACTAAGCTTTTTCGAGCACTGATTTTTTTCGTTGCACGA  
GACAAGTGCAACCCGCAATTGCAGGCAAATTATGTCTGAGGTAATGATTCCGTTTCGTGCAAGATTACACAGAAATCAA  
ATTACGACAACCTTTATTCAGTAAGCAAACAAGCCTTTGTTGGCATCTAATTATCCACTTATGTTGCGATTTGGGAGC  
TACAATCGTTTTGTTTAGTATATCTAGCGAGTTCCTTGGCGACATTTAAAATTTACAAATAAAGTTTCTTATTCAATCG  
GGACAGTGGAAATTGACTATTTTATTTATTAATGAACTATTTTTAATTTGGCTTAAGTTACTAAGGGGTTACTAATAGTT  
TGAGCGCAGTGCATGTCATGGGGACATGTGCAATTGTGTGTAAGCGGGAAGTGATCGCGGCCCTCCGAATTTGGCCATG  
CCAAATAATCCCAGCTCGAAAGGAGGGGACCCGGCGTCCAGGGCCATGGACATTGAACTTGAIAAAAAAAAAAACACAAA  
AATATATAACACAAAACGAAAATGCTGTGTACCGTTATGTTAGAGAAGTTGAGCAACGGGTTTTTCGTTTTGCAGTCAC  
GATGGATTTCCAAATTAGTGTAGGAGGGGGAGGGGAGGGAGGATAATGTCCAGGCTGCCATAAGTGGGGAATA  
AGGAAAATAAAACATGAAACACGGGTCGGCAATGTCATGCGGTATTCCGCTTTGCTTTCCGGCGCGCCTAGGCCGGCC  
GACATGTACAGAGCTCGAGGAGCGCCGGAGTATAAATAGAGGCGCTTCGTCTACGGAGCGACAATTCAATTCAAACAAG  
CAAAGTGAACACGTCGCTAAGCGAAAGCTAAGCAAATAAACAAGCGCAGCTGAACAAGCTAAACAATCTGCAGCCAAGC  
TGATCCTCTAGGGTACGCGCTAGAGTCGAGAGGCCTGTTAAACGATCCACCGTCCACCATTGGTGAGCAAGGGCGA  
GGAGCTGTTACCGGGTGGTGCCATCCTGGTCGAGCTGGACGGCGACGTAACGGCCACAAGTTCAGCGTGTCCGGC  
GAGGGCGAGGGCGATGCCACCTACGGCAAGCTGACCCTGAAGTTCATCTGCACCACCGGCAAGCTGCCCGTGCCCTGGC  
CCACCCTCGTGACCACCTGACCTACGGCGTGCAGTGCTTCAGCCGCTACCCCGACCACATGAAGCAGCACGACTTCTCA  
AGTCCGCCATGCCGAAGGCTACGTCCAGGAGCGCACCATCTTCTCAAGGACGACGGCAACTACAAGACCCGCGCCGAG

GTGAAGTTCGAGGGCGACACCCTGGTGAACCGCATCGAGCTGAAGGGCATCGACTTCAAGGAGGACGGCAACATCCTGG  
GGCACAAGCTGGAGTACAACACTACAACAGCCACAACGTCTATATCATGGCCGACAAGCAGAAGAACGGCATCAAGGTGAA  
CTTCAAGATCCGCCACAACATCGAGGACGGCAGCGTGCAGCTCGCCGACCACTACCAGCAGAACACCCCCATCGGCGACG  
GCCCCGTGCTGCTGCCGACAACCACTACCTGAGCACCCAGTCCGCCCTGAGCAAAGACCCCAACGAGAAGCGCGATCAC  
ATGGTCCTGCTGGAGTTCGTGACCGCCGCCGGGATCACTCTCGGCATGGACGAGCTGTACAAGAGCAGGCACAGAAGGC  
ATCGCCAGCGCTCTAGGAGCCGCAATCGCAGCCGAAGTCGCAGCAGTGAACGAAAACGCCGTCAACGGAGCCGAAGTCG  
CAGCAGTGAACGAAGACGCTACTTGTACAAGTAAAGCGGCCGCGACTCTAGATCATAATCAGCCATACCACATTTGTAGA  
GGTTTTACTTGCTTTAAAAACCTCCCACACCTCCCCCTGAACCTGAAACATAAAAATGAATGCAATTGTTGTTGTTAACTG  
TTTATTGCAGCTTATAATGGTTACAATAAAGCAATAGCATCACAAATTTACAAATAAAGCATTTTTTCTACTGCATTCTA  
GTTGTTGGTTTGTCCAAACTCATCAATGTATCTTACTAGTGGCCACGTGGAGGCCGCGCAATTCGAATGGCCATGGGACG  
TCGACCTGTGGTAATTATAACCCTGGCGCTAAGGATCGATACTGGGATACCCTGAACCCTCTTCTCCAACACCAAAAT  
GCAAATATATATACAGACTCTATATATATGCAGACTCTAGCTCTTATTATTTACCCAATTTGCTCAAAAAACAAGATTTTCGAT  
ATCGATTTTTATCGATTGCTTGGAAACGGGGCAAGTTATCGAATATCGGAAACAAACTCGATCTGCGTAGACACTAGTCAA  
GTTCTTCAAGTCTCTAGCTCTTCTGATATCCCTGCCTTCATACATATGGACGGACGGACGGACGGACATGGCTAGATCGAC  
TCGGCTATTGATGCTGATCAAGAATATATACTTTATGGGGTGGAGGTGCTTCACTTCTGCCTGTTACATACATTTGCATT  
TTGCACAAACCCTTCTACCCACTTTCAATGGGTTGAGAGTATAAAATGAAATTGTTTTGTGCTCATCGAATTCGAAATTG  
TCATTCGAAGCAGAAAATTGAAATCAACTGTGAAATTTCCAATAAATATTAAGCATATACAATTATGCATTTGAAGCTATTCC  
AAATTGAAGCTAGAAATTGAGCATATCTGCGGCACGCCGAAGATGAAATACCCTTCTTTGAGATAGGCGCACATTGTC  
ACGCCTCAATTCTCATTCTCGACCGATTCTTCTTTGATCTATATTAGATAGTCGTACAATATGAGATGAACTAGTCAATG  
CTACAGTTAGTCCAGATATCTTGATGAAAACAAAGTTTTTCGTACAAGAACCTACTTAGCGACCTATCGTTCTATGCCAGC  
TATATGATATAGAAAACGAGAAGAGATTACCTACGACGAATTGCAAGACGTTAGCTAAAATGCTGAGAGACTAGTTCTCA  
GAGAAACAAACAGATGGATCAGATATATATATGGAGATGTTCCCTTCTAGGTGTTACACATTCCATGACAATCTCATAATA  
CCCCGCACAAGCATCACTAGTGAATTCGCGGCCGCTGACGGTTCGACCATATGGGAGAGCTCCCAACGCGTTGGATGCAT  
AGCTTGAGTATTCTATAGTGTACCTAAATAGCTTGGCGTAATCATGGTCATAGCTGTTTCTGTGTGAAATTGTTATCCGC  
TCACAATTCACACAACATACGAGCCGGAAGCATAAAGTGTAAGCCTGGGGTGCCTAATGAGTGAGCTAACTCACATTA  
ATTGCGTTGCGCTCACTGCCCGCTTCCAGTCGGGAAACCTGTGCTGCCAGCTGCATTAATGAATCGGCCAACGCGCGGG  
GAGAGGCGGTTTTCGCTATTGGGCGCTCTCCGCTTCTCGCTCACTGACTCGCTGCGCTCGGTCGTTCCGGCTGCGGCGAG  
CGGTATCAGCTCACTCAAAGGCGGTAATACGGTTATCCACAGAATCAGGGGATAACGCAGGAAAGAACATGTGAGCAA  
AGGCCAGCAAAAGGCCAGGAACCGTAAAAAGGCCGCGTTGCTGGCGTTTTTCCATAGGCTCCGCCCCCTGACGAGCATC  
ACAAAAATCGACGCTCAAGTCAGAGGTGGCGAAACCCGACAGGACTATAAAGATAACCAGGCGTTTTCCCCTGGAAGCTCC  
CTCGTGCCTCTCCTGTTCCGACCCTGCCGTTACCGGATACCTGTCCGCTTCTCCCTTCCGGAAGCGTGGCGCTTCTC  
ATAGCTCACGCTGTAGGTATCTCAGTTCGGTGTAGGTGTTCCGCTCCAAGCTGGGCTGTGTGCACGAACCCCCGTTGAGC  
CCGACCCTGCGCTTATCCGGTAACTATCGTCTTGAAGTCCAACCCGGTAAGACACGACTTATCGCCACTGGCAGCAGCCA  
CTGGTAACAGGATTAGCAGAGCGAGGTATGTAGGCGGTGCTACAGAGTTCGAAAGTGGTGGCCTAACTACGGCTACAC  
TAGAAGAACAGTATTTGGTATCTGCGCTCTGCTGAAGCCAGTTACCTTCGAAAAAGAGTTGGTAGCTCTTGATCCGGCA  
AACAAACCACCGCTGGTAGCGGTGGTTTTTTTTGTTTGAAGCAGCAGATTACGCGCAGAAAAAAGGATCTCAAGAAGAT  
CCTTTGATCTTTTCTACGGGTCTGACGCTCAGTGAACGAAAACCTCACGTTAAGGGATTTTGGTCATGAGATTATCAAAA  
AGGATCTTACCTAGATCCTTTTAAATTAATAAATGAAGTTTTAAATCAATCTAAAGTATATATGAGTAAACTTGGTCTGACA  
GTTACCAATGCTTAATCAGTGAGGCACCTATCTCAGCGATCTGTCTATTTTCGTTTCATCCATAGTTGCCTGACTCCCCGTCGT  
GTAGATAACTACGATACGGGAGGGCTTACCATCTGGCCCCAGTGTGCAATGATACCGCGAGACCCACGCTACCCGGCTC  
CAGATTTATCAGCAATAAACCAGCCAGCCGGAAGGGCCGAGCGCAGAAGTGGTCCTGCAACTTTATCCGCTCCATCCAG  
TCTATTAATTGTTGCCGGGAAGCTAGAGTAAGTAGTTCCGCCAGTTAATAGTTTTCGCAACGTTGTTGCCATTGCTACAGGC  
ATCGTGGTGTACGCTCGTCTGTTGGTATGGCTTCATTCAGCTCCGTTCCCAACGATCAAGGCGAGTTACATGATCCCC  
ATGTTGTGCAAAAAGCGTTAGCTCCTTCGGTCTCCGATCGTTGTCAGAAGTAAGTTGGCCGAGTGTATCACTCATG  
GTTATGGCAGCACTGCATAATTCTTACTGTGATGCCATCCGTAAGATGCTTTTCTGTGACTGGTGGTACTCAACCAAGT  
CATTCTGAGAATAGTGTATGCGGCGACCGAGTTGCTCTGCCGCGCTCAATACGGGATAATACCGCGCCACATAGCAGA  
ACTTTAAAAGTGTCTCATCATTGAAAACGTTCTTCGGGGCGAAAACTCTCAAGGATCTTACCGCTGTTGAGATCCAGTTCG  
ATGTAACCACTCGTGCACCAACTGATCTTCAGCATCTTTACTTTACCAGCGTTTCTGGGTGAGCAAAAACAGGAAGG  
CAAAATGCCGCAAAAAGGGGAATAAGGGCGACACGGAAATGTTGAATACTCATACTTCTTTTCAATATTATTGAAGC  
ATTTATCAGGGTATTGTTCTCATGAGCGGATACATATTTGAATGATTTAGAAAAATAACAAATAGGGGTTCCGCGCACA

TTTCCCGAAAAGTGCCACCTGATGCGGTGTGAAATACCGCACAGATGCGTAAGGAGAAAATACCGCATCAGGAAATTGT  
AAGCGTTAATATTTTGTAAAATTCGCGTTAAATTTTTGTTAAATCAGCTCATTTTTTAACCAATAGGCCGAAATCGGCAA  
ATCCCTTATAAATCAAAAGAATAGACCGAGATAGGGTTGAGTGTTGTTCCAGTTTGAACAAGAGTCCACTATTAAGAA  
CGTGGACTCCAACGTCAAAGGGCGAAAAACCGTCTATCAGGGCGATGGCCACTACGTGAACCATCACCTAATCAAGTT  
TTTTGGGGTTCGAGGTGCCGTAAAGCACTAAATCGGAACCCTAAAGGGAGCCCCGATTTAGAGCTTGACGGGGAAAGCC  
GGCGAACGTGGCGAGAAAGGAAGGGAAGAAAGCGAAAGGAGCGGGCGCTAGGGCGCTGGCAAGTGTAGCGGTCACG  
CTGCGCGTAACCACCACCCGCCGCGCTTAATGCGCCGCTACAGGGCGCGTCCATTCGCCATTCAGGCTGCGCAACTGTT  
GGGAAGGGCGATCGGTGCGGGCCTCTTCGCT

Supplemental text B: Annotated pGEM-3XP3.RFP-*tan* sequence (6653bp):

5' homology arm

5' target PAM

Unique portion of 5' target site for reporter excision (restriction sites: BglII, BsiWI, Acc65I)

3XP3 eye-expression Promoter

RFP with  $\alpha$ -tubulin 3'UTR

Unique portion of 3' target site for reporter excision (restriction sites: NarI, Bsu36I, ClaI)

3' homology arm

3' target PAM

Restriction sites for homology arm removal: 5' end – Apal, NcoI; 3' end – SexAI, MluI

```
ATTACGCCAGCTGGCGAAAGGGGGATGTGCTGCAAGGCGATTAAGTTGGGTAACGCCAGGGTTTTCCAGTCACGACGT
TGAAAACGACGGCCAGTGAATTGTAATACGACTCACTATAGGGCGAATTGGGCCGACGTCGCATGCTCCCGGCCGCA
TGGCGGCCGCGGAATTCGATCTCTGGATAAGCGTCAGCCTCGCGTTGCGTCGCAGTCGCAGTCGCAGTCGCCTTCGCTG
CTGGCGTCGCAGCGTCGCCATTGCTGTTATTGTTGTTGCTGTGTTTCTATATGCGTTGCTGCTCCGTTATCGCAGCGACG
TCGTCGTCGTCGTCGTCGTCATCAGCTGTCTTCGTGTTGTTGTTGCTGAGTGTTGTTGTTGCGCACCTCG
AATTGCTGCCGCAAACATGTCCAATTCAGTTTGAATTCTGCCTTCAAGCGCTTTAGAACAATCATATAAAAACCTGGCTT
GAATTATCTATATACAATTTGTTTACACTGAAATCTCTCTCTCTCGTAACCTTCTCTCGCTCTGTCTGTGTGTGCGTG
CGTGTGTTGAGTGTTGGTAAAGTTTGTAAATGAAATTAACTCAGTTGTGTTTTTTTTATTATTATTATTATTCATCT
TGTGAATTTGTTTTGTTTTGTTGCAAATTTGTTGAATTCATTTCCAGCGAGTTTTATTCCACTGAATTATTATATA
TATTTCTGTGCTTTATTTTTGTTTCGCTTTCTATTTACATTTGTGATCGTGGATAAGACGAACCCAAGCAAAAAAAAA
AAAGAAAAGAAAAGAATAATTGAGAGCATATTACTGCTCATCCTGCTCGAATTCAGAGCCAAATAGCGCGAAGAGC
GATAAACGGTCCACAGCACATAGACAAAACGAAAGCCCAGGAAGCCATGTGCACCTCCCCGGTGGCCACCAAATGTC
GTCCAGCATGTCCTCCGGCAAGATCTCGTACGGTACC AATTGAGCTCATAACTCGTATAATGTATGCTATACGAAGTTAT
GTCGACGAATTCGCGGCCGCGAGCTCGCCGGGGATCTAATTAATTAGAGACTAATTAATTAGAGCTAATTAATTAG
GATCCAAGCTTATCGATTTCAACCCTCGACCGCCGGAGTATAAATAGAGGCGCTTCGTCTACGGAGCGACAATTAATTC
AAACAAGCAAAGTGAACACGTCGCTAAGCGAAAGCTAAGCAAATAAACAAGCGCAGCTGAACAAGCTAAACAATCGGGC
GGCCGACTAGAGCCGGTCGCCACCAATGAGGTCTTCCAAGAATGTTATCAAGGAGTTCATGAGGTTAAGGTTTCGATGG
AAGGAACGGTCAATGGGCACGAGTTTGAATAGAAGGCGAAGGAGAGGGGAGGCCATACGAAGGCCACAATACCGTAA
AGCTTAAGGTAACCAAGGGGGGACCTTTGCCATTTGCTGGGATATTTGTCACCACAATTCAGTATGGAAGCAAGGTAT
ATGTCAAGCACCTGCCGACATACCAGACTATAAAAAGCTGTCAATTCCTGAAGGATTTAAATGGGAAAGGGTCATGAAC
TTTGAAGACGGTGGCGTCTACTGTAACCCAGGATTCAGTTTGCAGGATGGCTGTTTCATCTACAAGGTCAAGTTCATT
GGCGTGAACCTTCTCCGATGGACCTGTTATGCAAAAGAAGACAATGGGCTGGGAAGCCAGCACTGAGCGTTTGTATCC
TCGTGATGGCGTGTTGAAAGGAGAGATTATAAGGCTCTGAAGCTGAAAGACGGTGGTCATTACCTAGTTGAATCAAAA
GTATTTACATGGCAAAGAAGCCTGTGCAGCTACCAGGGTACTACTATGTTGACTCCAACTGGATATAACAAGCCACAAC
GAAGACTATACAATCGTTGAGCAGTATGAAAGAACCGAGGGACGCCACCATCTGTTCCTTTAGCGGCCATCGAATTCGAG
CTGCCCCACTAAGCGTCGCGCCACTTCAACGCTCGATGGGAGCGTCATTGGTGGGCGGGGTAACCGTCGAAATCAGTGTT
TACGCTTCCAATCGCAACAAAAAATCACTGCAACACTGAAAAGCATAACGAAAACGATGAAGATTGTACGAGAAACCATA
AAGTATTTATCCACAAAGACACGTATAGCAGAAAAGCCAAGTAACTCGGCCGATAAGTTGTGTACACAAGAATAAAATC
GGCCAGATTCAGTGTTGTAGAAAATAAGAAAACCCACTATGTTTTCTTGCCTTTCTTTCTCCAGCGATCATTCAATTC
GTGGTGAAGAAGCGGGGTCATTGCACGGAGTTTCGACTGCGGGAAAGCAGAGCTGCCGTTCACTTCGTCTATAATTAGC
GCTTTCTATTTCCCGATTCCGGCCGCTGCTGCGCTTTCCGCTGCTGTTTGTGGCAAGTGTAGCAGCAGGCTGTGCAC
GCAGTGTGGCATGCACTTGGCTTCCACCGTTGGTATCGATTCTCTGGGACGATGAGTCATTCCTTTCGGGGCCACAGCAT
AATCGTTGCCAGCTCACCGAAATGGTGACTTCATTTCTAACTGCCGTCAAGCATGCGATTGTACATACATACATATTTATA
TATGTACATATTTATGTGACTATGGTAGGTCGATATAATAGCAATCAACGCAAGCAAATGTGTCAGTCCTGCTTACAGGAA
CGATTCTATTTAGTAATTTTCGTTGTATAAAGTAATTATGTATGTATGTAAGCCCCATAAATCTGAAACAATTAGGCAAAAC
CATGCGAAGCTCTCTGGCGCCTAAGGATCGATGCTAGGTCTGACTTTTATATAGAATAATCTTGCCAGATTTGCATCTTCT
CTGAGTGAACCTTGTGTTGATTCTCTCTCTCGCTCTCGCCCTCGCTTCTCGTTCTCGCTCTCGCTCTCTCTCTTATCAGC
AGGTGCAATTACAGCTACATATAGTAATCACATAAAGATAATATGATCCTGATAAGCGTTTATACGATTCGACTAGTATAT
```

CTACTTGTTTCTTTCTTCTACTTTTTGCCATTCGTGACCCAGTTCCTTAACCTTAACCTTCACTCAAACTAACACTCACTCAC  
ACTCACACACACACACACACACACACACAAATATAACAATCACTCACTTGTTGCTTTGAGCCGGAAAAACAAAAAAGAA  
AAAAAAGTGCCAATATCAAGGGCAACAATTGGCATGCAGGCCGACTCCGTCTGGGCGAGCTGCTGGTGGGGTTGGG  
TTGGCAGGTGAGCGGGCGCTGGGCGGGTTGCCCGTGGTCTGGACCCACTCTGCTCCGTGAGCAGTCCCCGCGCACAT  
AATTAACAAGCTGGCAACAAGATCTATGTCCAACAATAAACCATTAATTCATAATGTTGTTTTAGCGTTTTGTTTTGTT  
TGCCCTGTCGATCAGTCGTGATCGATTATGGTTCTTTTTGTTGTTGTTGTTGTTGTTGTATATTTTGTAAAATATATTTTTGC  
CCAGCAGCAGCATATTAGCATAACAATACGTTTAAAGAGGGCAATTTGCAAACGGAGTTGGAATCAAATATTTAGAAAAGCC  
GCTTGCAATCAATTCAATATTTCCAATTAATCATAATAATATACATTATATATATATATAAAATATATGTGTGTGTG  
CTTTGCAGGGTGCACCTTTGGCTCGATGATCAAGAAGTTTCTGATCTTATCGCAGCCACTGAACGAGACCTACTTGCCGCT  
CTATGGCACCGCCAAAAGGCAGTAAGTACTACTCCACGGACCGATTGCTTCTCAGATACCGCTTGATGCATAGCTTGAG  
TATTCTATAGTGTACCTAAATAGCTTGGCGTAATCATGGTCATAGCTGTTTCTGTGTGAAATTGTTATCCGCTCACAAAT  
CCACACAACATACGAGCCGGAAGCATAAAGTGTAAGCCTGGGGTGCCTAATGAGTGAGCTAACTCACATTAATTGCGTT  
GCGCTCACTGCCCGCTTCCAGTCGGGAAACCTGTCGTGCCAGCTGCATTAATGAATCGGCCAACGCGCGGGGAGAGGC  
GGTTTGCATATTGGGCGCTTCCGCTTCTCGCTCACTGACTCGCTGCGCTCGGTGCTTCCGCTGCGGCGAGCGGTATCA  
GCTCACTCAAAGCGGTAATACGGTTATCCACAGAATCAGGGGATAACGCAGGAAAGAACATGTGAGCAAAGGCCAGC  
AAAAGGCCAGGAACCGTAAAAGGCCGCGTTGCTGGCGTTTTTCCATAGGCTCCGCCCCCTGACGAGCATCACAAAAT  
CGACGCTCAAGTCAGAGGTGGCGAAACCCGACAGGACTATAAAGATACCAGGCGTTTTCCCCTGGAAGCTCCCTCGTGCG  
CTCTCCTGTTCCGACCCTGCCGTTACCGGATACCTGTCCGCTTTCTCCCTTCCGGAAGCGTGCGCTTTCTCATAGCTCA  
CGCTGTAGGTATCTCAGTTCGGTGTAGGTGTTGCTCCAAGCTGGGCTGTGTGCACGAACCCCCGTTAGCCCGACCGC  
TGCGCTTATCCGGTAACTATCGTCTTGAGTCCAACCCGGTAAGACACGACTTATCGCCACTGGCAGCAGCCACTGGTAAC  
AGGATTAGCAGAGCGAGGTATGTAGGCGGTGCTACAGAGTCTTGAAGTGGTGGCTAACTACGGCTACACTAGAAGAA  
CAGTATTTGGTATCTGCGCTCTGCTGAAGCCAGTTACCTTCGAAAAAGAGTTGGTAGCTCTTGATCCGGCAAACAACCA  
CCGCTGGTAGCGGTGGTTTTTTTTGTTTGAAGCAGCAGATTACGCGCAGAAAAAAGGATCTCAAGAAGATCCTTTGATC  
TTTTCTACGGGGTCTGACGCTCAGTGAACGAAAACCTCACGTTAAGGGATTTTGGTATGAGATTATCAAAAAGGATCTTC  
ACCTAGATCCTTTAAATTAATAAATGAAGTTTTAAATCAATCTAAAGTATATAGAGTAACTTGGTCTGACAGTTACCAAT  
GCTTAATCAGTGAGGCACCTATCTCAGCGATCTGTCTATTTGTTTATCCATAGTTGCCTGACTCCCCGTGCTGTAGATAAC  
TACGATACGGGAGGGCTTACCATCTGGCCCCAGTGTGCAATGATACCGCGAGACCCACGCTCACCGGCTCCAGATTTAT  
CAGCAATAAACAGCCAGCCGGAAGGGCCGAGCGCAGAAGTGGTCTGCAACTTTATCCGCTCCATCCAGTCTATTAAT  
TGTTGCCGGGAAGCTAGAGTAAGTAGTTCGCCAGTTAATAGTTTGCGCAACGTTGTTGCCATTGCTACAGGCATCGTGGT  
GTCACGCTCGTCTTTGGTATGGCTTCATTCAGCTCCGTTCCCAACGATCAAGGCGAGTTACATGATCCCCATGTTGTG  
CAAAAAGCGGTTAGCTCCTTCGGTCTCCGATCGTTGTCAGAAGTAAGTTGGCCGAGTGTTATCACTCATGGTTATGGC  
AGCACTGCATAATTCTTACTGTCATGCCATCCGTAAGATGCTTTTCTGTGACTGGTGAGTACTCAACCAAGTCATTCTGA  
GAATAGTGTATGCGGCGACCGAGTTGCTCTTGCCGGCGTCAATACGGGATAATACCGCGCCACATAGCAGAAGTTAAA  
AGTGCTCATATTGAAAACGTTCTTCGGGGCGAAAACCTCAAGGATCTTACCGCTGTTGAGATCCAGTTCGATGTAACC  
CACTCGTGCACCCAAGTATCTCAGCATCTTTACTTTTACCAGCGTTTCTGGGTGAGCAAAAACAGGAAGGCAAAATGC  
CGCAAAAAGGGAATAAGGGCGACACGAAATGTTGAATACTCATACTTCTCTTTTTCAATATTATTGAAGCATTATCA  
GGGTTATTGTCTCATGAGCGGATACATATTTGAATGATTTAGAAAAATAACAATAGGGGTTCCGCGCACATTTCCCCG  
AAAAGTGCCACCTGATGCGGTGTGAAATACCGCACAGATGCGTAAGGAGAAAATACCGCATCAGGAAATTGTAAGCGTT  
AATATTTTGTAAAATTCGCGTTAAATTTTTGTTAAATCAGCTCATTTTTTAACCAATAGGCCGAAATCGGCAAAAATCCCTTA  
TAAATCAAAGAATAGACCGAGATAGGGTTGAGTGTGTTCCAGTTTGGAAACAAGAGTCCACTATTAAGAACGTGGACT  
CCAACGTCAAAGGGCGAAAACCGTCTATCAGGGCGATGGCCCACTACGTGAACCATCACCTAATCAAGTTTTTTGGGG  
TCGAGGTGCCGTAAAGCACTAAATCGGAACCCTAAAGGGAGCCCCGATTTAGAGCTTGACGGGGAAAGCCGGCGAACG  
TGCGGAGAAAAGGAAGGGAAGAAAGCGAAAGGAGCGGGCGCTAGGGCGCTGGCAAGTGTAGCGGTACGCTGCGCGTA  
ACCACCACACCCGCCGCGTTAATGCGCCGCTACAGGGCGCGTCCATTGCCATTAGGCTGCGCAACTGTTGGGAAGGG  
CGATCGGTGCGGGCCTCTTCGCT

**Table S1: Oligonucleotides and primers used in reagent construction and molecular screening:** All base-pairing nucleotides are in capital letters. Tailing sequences added to primers are in lowercase letters.

| Pair # | Purpose                                                                                                    | Forward (description)                                                                                                                     | Reverse (description)                                                                                                                                    |
|--------|------------------------------------------------------------------------------------------------------------|-------------------------------------------------------------------------------------------------------------------------------------------|----------------------------------------------------------------------------------------------------------------------------------------------------------|
| 1      | Screen for plasmid backbone integration on the 5' end of the donor. (282bp band if backbone is present)    | GATGTGCTGCAAGGCGATTA<br>(In pGEM-WingGFP-tan plasmid backbone, 5' of homology arm)                                                        | GAGCAGGCAACGCATATAGAAAC<br>(Within the pGEM-WingGFP-tan 5' homology arm)                                                                                 |
| 2      | Screen for plasmid backbone integration on the 3' end of the donor. (481bp band if backbone is present)    | GCGACCTATCGTTCCTATGC<br>(Within the pGEM-WingGFP-tan 3' homology arm)                                                                     | CAGCTGGCAGCAGGTTTC<br>(In pGEM-WingGFP-tan plasmid backbone, 3' of homology arm)                                                                         |
| 3      | Confirm wing-GFP reporter insertion at correct locus on the 5' side. (1541bp band if correctly integrated) | AAACGAACCGCAACTGATATTGAAC<br>(In <i>D. americana tan</i> transgene DNA outside the 5' homology arm. Represented as primer X in Figure 2.) | GTCAATTTCCACTGTCCCGATTG<br>(In the pGEM-WingGFP-tan reporter sequence, specifically the pupal wing enhancer from the <i>D. melanogaster yellow</i> gene) |
| 4      | Confirm wing-GFP reporter insertion at correct locus on the 3' side. (1163bp band if correctly integrated) | TGGTTTGTCCAAACTCATCAA<br>(In the pGEM-WingGFP-tan reporter sequence, specifically in GFP)                                                 | AATATAGAGCGCAGCGGCTGTT<br>(In <i>D. americana tan</i> transgene DNA outside the 3' homology arm. Represented as primer Y in Figure 2.)                   |
| 5      | Amplify 5' homology arm for pGEM-WingGFP-tan tailed with Gibson assembly overlaps                          | catggcgccgcccgaattcgatCTCTGGATA<br>AGCGTCAGCCTC<br>(Represented as primer A in Figure 2.)                                                 | gatgagtatggatggtaccgtacgagatctTGCC<br>GGAGGACATGCTGGAC                                                                                                   |
| 6      | Amplify 3' homology arm                                                                                    | ttataaccctggcgccctaaggatcgatACTTGG<br>GGATACCCTGAACC                                                                                      | gccgcgaattcactagtgatGCTTGTGCGGG<br>GTATTATGAG                                                                                                            |

|    |                                                                                                                                                                      |                                                                                                                                             |                                                                                                                                           |
|----|----------------------------------------------------------------------------------------------------------------------------------------------------------------------|---------------------------------------------------------------------------------------------------------------------------------------------|-------------------------------------------------------------------------------------------------------------------------------------------|
|    | for pGEM-WingGFP-tan tailed with Gibson assembly overlaps                                                                                                            |                                                                                                                                             | (Represented as primer B in Figure 2)                                                                                                     |
| 7  | Amplify wing-expressing GFP reporter tailed with Gibson assembly overlaps                                                                                            | agatctcgtacggtaccATCCATACTCATCAATG<br>TATCTTATAGCTTATCGTTACGTGTA                                                                            | agtatcgatccttaggcgccAGGGTTATAATTACC<br>ACAGGTCG                                                                                           |
| 8  | Amplify <i>tan</i> sequence to replace wing-GFP reporter in second stage of allele replacement                                                                       | catggcgccgcggaattcgatCTCTGGATA<br>AGCGTCAGCCTC<br>(Same forward primer as in Pair #5 from this table. Represented as primer A in Figure 2.) | gccgcaattcactagtgatGCTTGTGCGGG<br>GTATTATGAG<br>(Same reverse primer as in Pair #6 from this table. Represented as primer B in Figure 2.) |
| 9  | Spanning PCR across edited <i>tan</i> locus after second replacement step (~2.5kb band if repaired correctly)                                                        | AAACGAACCGCAACTGATATTGAAC<br>(Same forward primer as in Pair #3 from this table. Represented as primer X in Figure 2.)                      | AATATAGAGCGCAGCGGCTGTT<br>(Same reverse primer as in pair #4 from this table. Represented as primer Y in Figure 2.)                       |
| 10 | Amplify new 3' homology arm which in the modified pGEM-WingGFP-tan before the construction of pGEM-3XP3.RFP-tan (cloned into pGEM-WingGFP-tan using Bsu36I and MluI) | atcctgcctaaggatcGATGCTAGGTCTGAC<br>TTTTATATAGAATAATC<br>(Tailed with Bsu36I and ClaI restriction sites.)                                    | gatacaacgcgtatctGAGAAGCAACCTGG<br>TC<br>(Tailed with MluI restriction sites.)                                                             |
| 11 | Amplify 3XP3-RFP reporter out of M{3XP3-RFP.attP}ZH-51C landing site to assemble                                                                                     | ttatggcgcgCCAACGTGTCGGTACCAATT<br>G<br>(Contains Acc65I restriction site in the primer.)                                                    | atcgatccttaggcgccAGAGAGCTTCGCAT<br>GGTTTTGC<br>(Tailed with NarI and Bsu36I restriction sites.)                                           |

|      |                                                                                                     |                                                                                                                                                                                                                                                                                                                                                                                                                          |                                                                                                                                                                          |
|------|-----------------------------------------------------------------------------------------------------|--------------------------------------------------------------------------------------------------------------------------------------------------------------------------------------------------------------------------------------------------------------------------------------------------------------------------------------------------------------------------------------------------------------------------|--------------------------------------------------------------------------------------------------------------------------------------------------------------------------|
|      | pGEM-3XP3.RFP-tan                                                                                   |                                                                                                                                                                                                                                                                                                                                                                                                                          |                                                                                                                                                                          |
| 12   | Oligo-nucleotide pair for cloning sgRNA expression plasmid pCFD3 targeting t5 site (see Figure 2)   | gtcGCGACGGGGCAATATCTTGC<br>(Sense oligo. which matches t5 target site. Note that the sgRNA does not include the PAM nucleotides. "gtc" tail is for cloning into the BbsI restriction site in pCFD3. Instructions for pCFD3 cloning at: <a href="http://www.crisprflydesign.org/wp-content/uploads/2014/05/Cloning-with-pCFD3.pdf">http://www.crisprflydesign.org/wp-content/uploads/2014/05/Cloning-with-pCFD3.pdf</a> ) | aaacGCAAGATATTGCCCGTCCG<br>(Antisense oligo. to anneal with sense oligo to form insert for cloning. "aaac" tail is for cloning into the BbsI restriction site in pCFD3.) |
| 13   | Oligo-nucleotide pair for cloning sgRNA expression plasmid pCFD3 targeting t3 site (see Figure 2)   | gtcGTTCAGGGTATCCCCAAGTC<br>(See description for Pair #12)                                                                                                                                                                                                                                                                                                                                                                | aaacGACTTGGGGATACCCTGAA<br>(See description for Pair #12)                                                                                                                |
| 14   | Oligo-nucleotide pair for cloning sgRNA expression plasmid pCFD3 targeting t5re site (see Figure 2) | gtcGGTACCGTACGAGATCTTGC<br>(See description for Pair #12)                                                                                                                                                                                                                                                                                                                                                                | aaacGCAAGATCTCGTACGGTAC<br>(See description for Pair #12)                                                                                                                |
| 15   | Oligo-nucleotide pair for cloning sgRNA expression plasmid pCFD3 targeting t3re site (see Figure 2) | gtcGGCGCCTAAGGATCGATACT<br>(See description for Pair #12)                                                                                                                                                                                                                                                                                                                                                                | aaacAGTATCGATCCTTAGGCCG<br>(See description for Pair #12)                                                                                                                |
| Seq1 | Sanger sequencing 5' PolyT                                                                          | CTCTGGATAAGCGTCAGCCTCG                                                                                                                                                                                                                                                                                                                                                                                                   |                                                                                                                                                                          |
| Seq2 | Sanger sequencing 5' PolyT                                                                          | CGCCCATTGCTGTTATTGTT                                                                                                                                                                                                                                                                                                                                                                                                     |                                                                                                                                                                          |
| Seq3 | Sanger sequencing 5' target sites                                                                   | ATTACTGCTCATCCTGCTCG                                                                                                                                                                                                                                                                                                                                                                                                     |                                                                                                                                                                          |
| Seq4 | Sanger                                                                                              | TCACTATGAGGTCTGGCTTCG                                                                                                                                                                                                                                                                                                                                                                                                    |                                                                                                                                                                          |



|      |                                                |  |                         |
|------|------------------------------------------------|--|-------------------------|
|      | sequencing 3' PolyT                            |  |                         |
| Seq5 | Sanger sequencing 3' PolyT and 3' target sites |  | TTGACTAGTGTCTACGCAGATCG |

**Table S2: Genome editing rates in the first stage of the allele swap**

| Embryos injected | Injected adults crossed | Founders <sup>1</sup> | Homozygous edited lines established from progeny of founders | Proportion of founders' progeny with wing GFP expression | Homozygous lines with carrying correct <sup>2</sup> repair events |
|------------------|-------------------------|-----------------------|--------------------------------------------------------------|----------------------------------------------------------|-------------------------------------------------------------------|
| 1220             | 150                     | 6                     | 43                                                           | 2.5%-25.4%                                               | 13                                                                |

1: In this experiment, founders are defined as injected adults who produced progeny with pupal wing GFP expression.

2: Correct repair events were identified first by the PCR screens described in the results section. All 13 lines that passed the PCR screen were later verified to carry correctly repaired sequence by Sanger sequencing.

**Table S3: Genome editing rates in the second stage of the allele swap**

| Embryos injected | Injected adults crossed | Founders <sup>1</sup> | Homozygous edited lines established from progeny of founders | Proportion of founders' progeny that lost wing GFP expression | Homozygous lines with carrying correct <sup>2</sup> repair events |
|------------------|-------------------------|-----------------------|--------------------------------------------------------------|---------------------------------------------------------------|-------------------------------------------------------------------|
| 1361             | 179                     | 5                     | 10                                                           | 0.68%-1.1%                                                    | 1                                                                 |

1: In this experiment, founders are defined as injected adults who produced progeny that did not express GFP in the pupal wings.

2: Correct repair events were identified first by the PCR screen described in the results section. The single line that passed the PCR screen was later verified to have a correctly repaired sequence by Sanger sequencing.

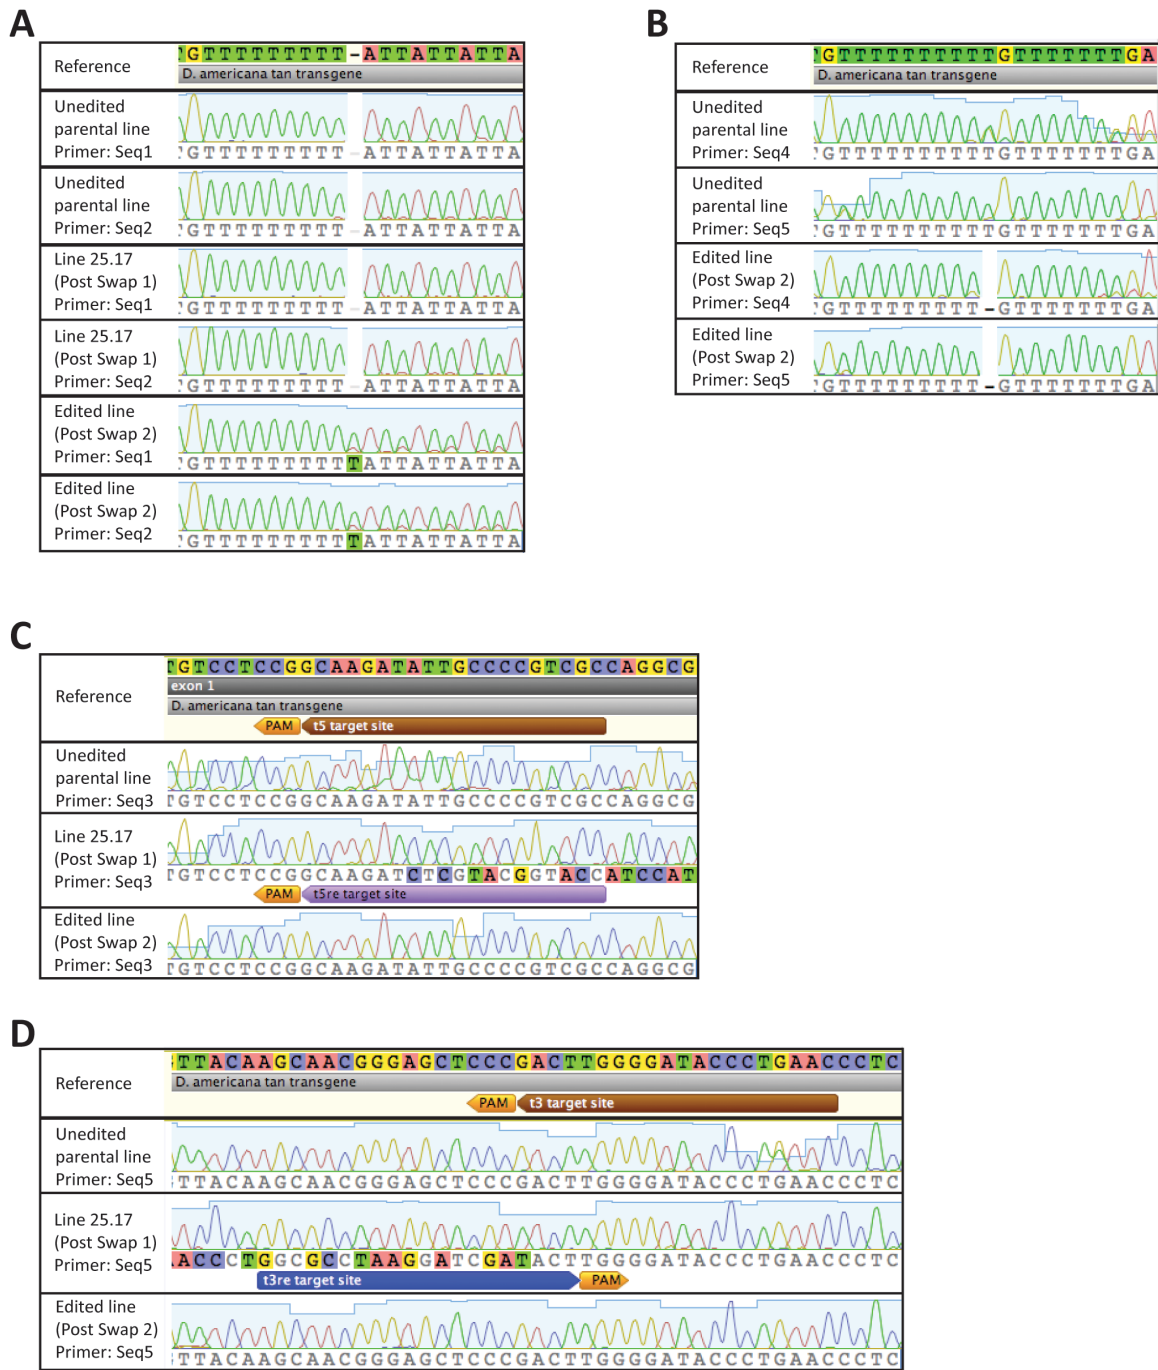

**Figure S1: Chromatograms showing the sequence of the edited sites before and after each stage of the editing process.** In all panels, the reference sequence in the top row represents the unedited *D. americana tan* transgene that was targeted for genome editing in this study. The sequencing primers are listed to the left of the chromatograms, and all primer sequences are provided in Table S1. Panels (A) and (B) show chromatograms of the edited homopolymer runs in the 5' homology arm (A) and in first intron (B) of the *D. americana tan* transgene throughout the allele swap process. Sequencing data for homopolymer runs are shown for two different primers per DNA template. Panels (C) and (D) show chromatograms of the 5' target sites and 3' target sites, respectively, across the stages of genome editing. The PAM sequences and sgRNA target sites are labeled.
